# Supplementary material for: l-Phenylalanine-derived pseudopeptidic bioinspired materials: Zn(ii) induced fluorescence enhancement and precise tuning of self-assembled nanostructures
Source: Royal Society of Chemistry journal article supplement (doi:10.1039/d3sm00703k), 2023-01-01
Supplement: d3sm00703k1.pdf [file d3sm00703k1.pdf]

## *Electronic Supporting Information*

### L-Phenylalanine derived pseudopeptidic bioinspired materials: Zn (II) induced fluorescence enhancement and precise tuning of self- assembled nanostructures

*Kamlesh Kumar Nigam, Arpna Tamrakar and Mrituanjay D. Pandey\**

*Department of Chemistry, Institute of Science, Banaras Hindu University, Varanasi- 221005*

*UP, India. Email: [mdpandey.chem@bhu.ac.in](mailto:mdpandey.chem@bhu.ac.in)*

|                                                                                                                      |     |
|----------------------------------------------------------------------------------------------------------------------|-----|
| <b>Fig. S1 &amp; S2</b> <sup>1</sup> H & <sup>13</sup> C NMR spectra of <b>1</b> .....                               | S2  |
| <b>Fig. S3</b> HRMS spectra of <b>1</b> & <b>S4</b> <sup>1</sup> H NMR spectra of <b>2</b> .....                     | S3  |
| <b>Fig. S5</b> <sup>13</sup> C NMR spectra of <b>2</b> & <b>S6</b> HRMS spectra of <b>2</b> .....                    | S4  |
| <b>Fig. S7</b> <sup>1</sup> H & <b>S8</b> <sup>13</sup> C NMR spectra of <b>3</b> .....                              | S5  |
| <b>Fig. S9</b> HRMS spectra of <b>3</b> .....                                                                        | S6  |
| <b>Fig. S10</b> UV-Visible spectrum of <b>1(a)</b> , <b>2(b)</b> , and <b>3(c)</b> .....                             | S6  |
| <b>Fig. S11</b> Fluorescence lifetime decay curve of <b>1(a)</b> , <b>2(b)</b> , and <b>3(c)</b> .....               | S6  |
| <b>Fig. S12</b> Reversibility plot of <b>1(a)</b> , <b>2(b)</b> , and <b>3(c)</b> .....                              | S7  |
| <b>Fig. S13</b> Proposed model for reversibility .....                                                               | S7  |
| <b>Fig. S14</b> Interference plot of <b>1(a)</b> , <b>2(b)</b> , and <b>3(c)</b> .....                               | S7  |
| <b>Fig. S15</b> Jobs plot and <b>S16</b> Benesi-Hildebrand plot of <b>1(a)</b> , <b>2(b)</b> , and <b>3(c)</b> ..... | S8  |
| <b>Fig. S17</b> Sensitivity and <b>S18</b> LOD plot of <b>1(a)</b> , <b>2(b)</b> , and <b>3(c)</b> .....             | S9  |
| <b>Fig. S19</b> Circular Dichroism (CD) spectra of <b>1-3</b> with and without Zn(II) ion.....                       | S10 |
| <b>Fig. S20</b> IR deconvolution spectra of <b>1-3</b> with and without Zn(II) ion .....                             | S11 |
| <b>Fig. S21</b> AFM images of <b>1</b> and <b>S22</b> AFM images of <b>2</b> .....                                   | S12 |
| <b>Scheme. S1</b> and <b>S2</b> A proposed model of AFM self-assembly for <b>1</b> and <b>2</b> respectively.....    | S13 |

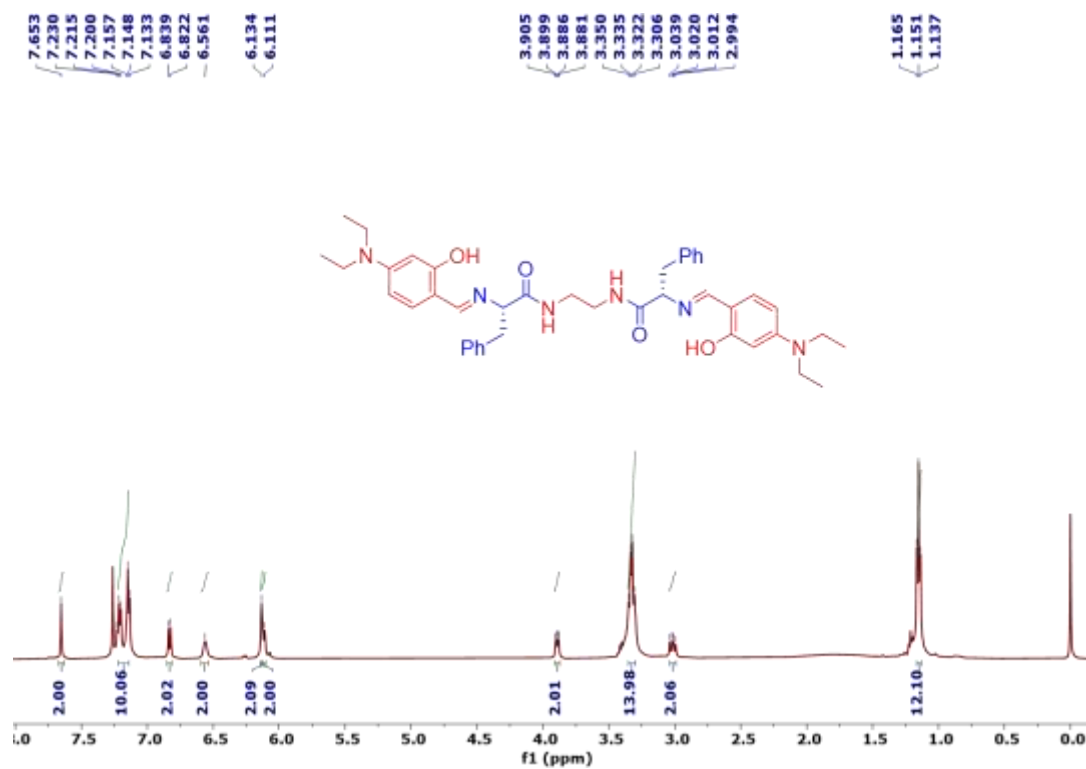

Fig. S1.  $^1\text{H}$  NMR (500 MHz,  $\text{CDCl}_3$ ) of 1

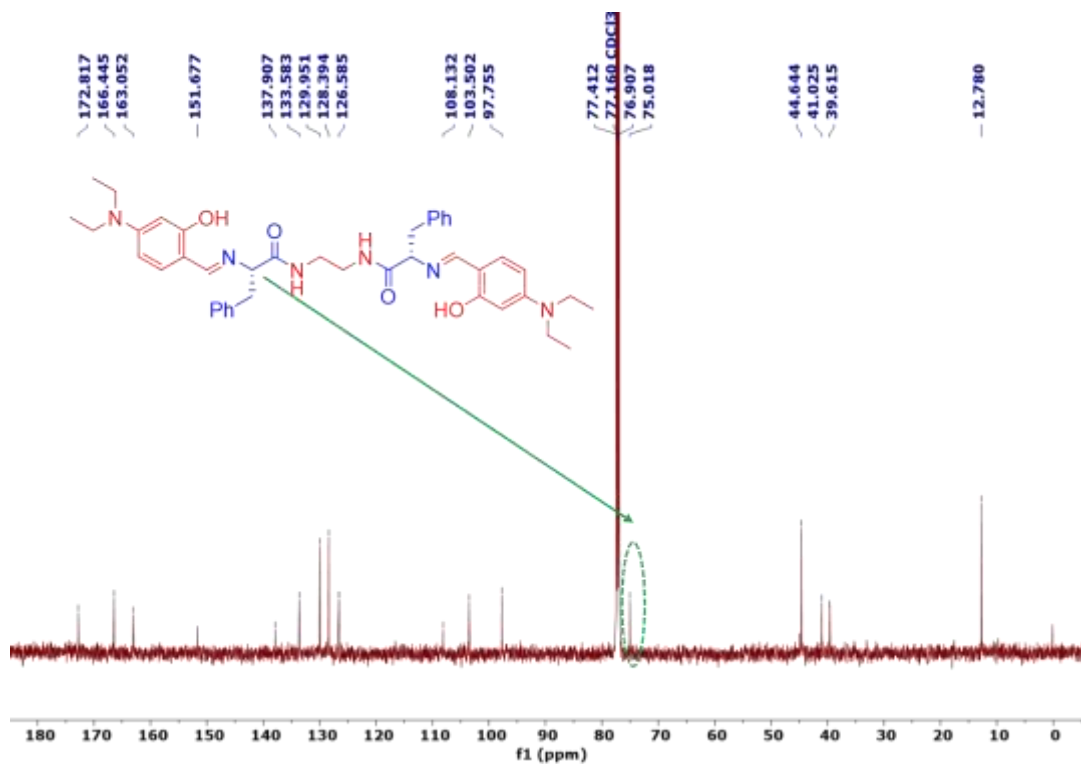

Fig. S2.  $^{13}\text{C}\{^1\text{H}\}$  NMR (126 MHz,  $\text{CDCl}_3$ ) of 1

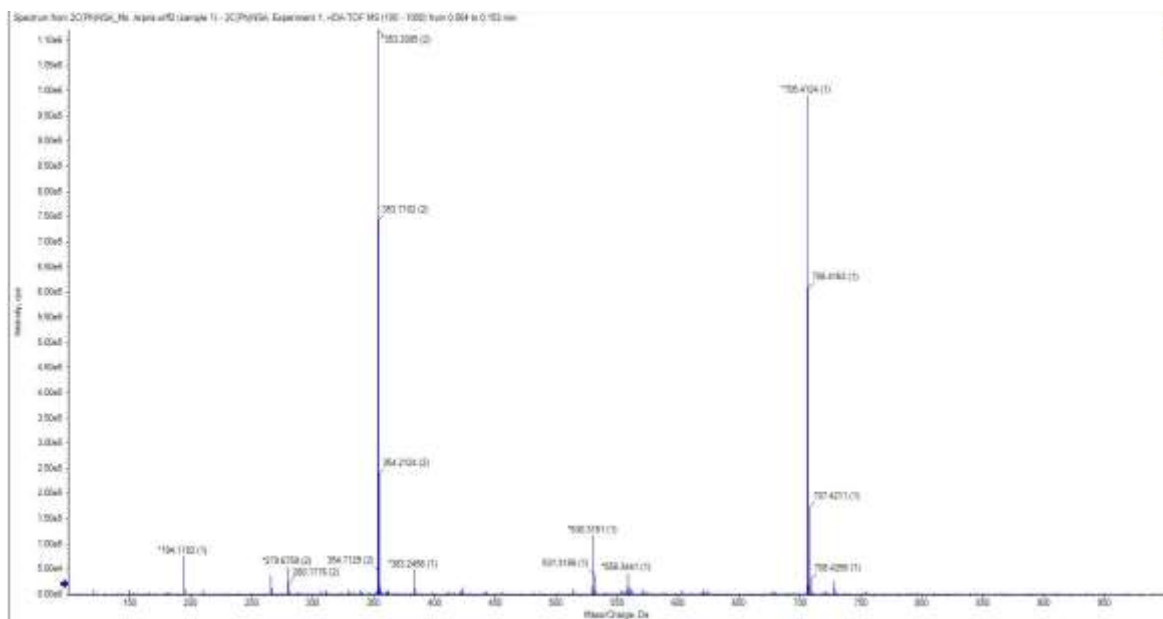

Fig. S3. HRMS data of **1**

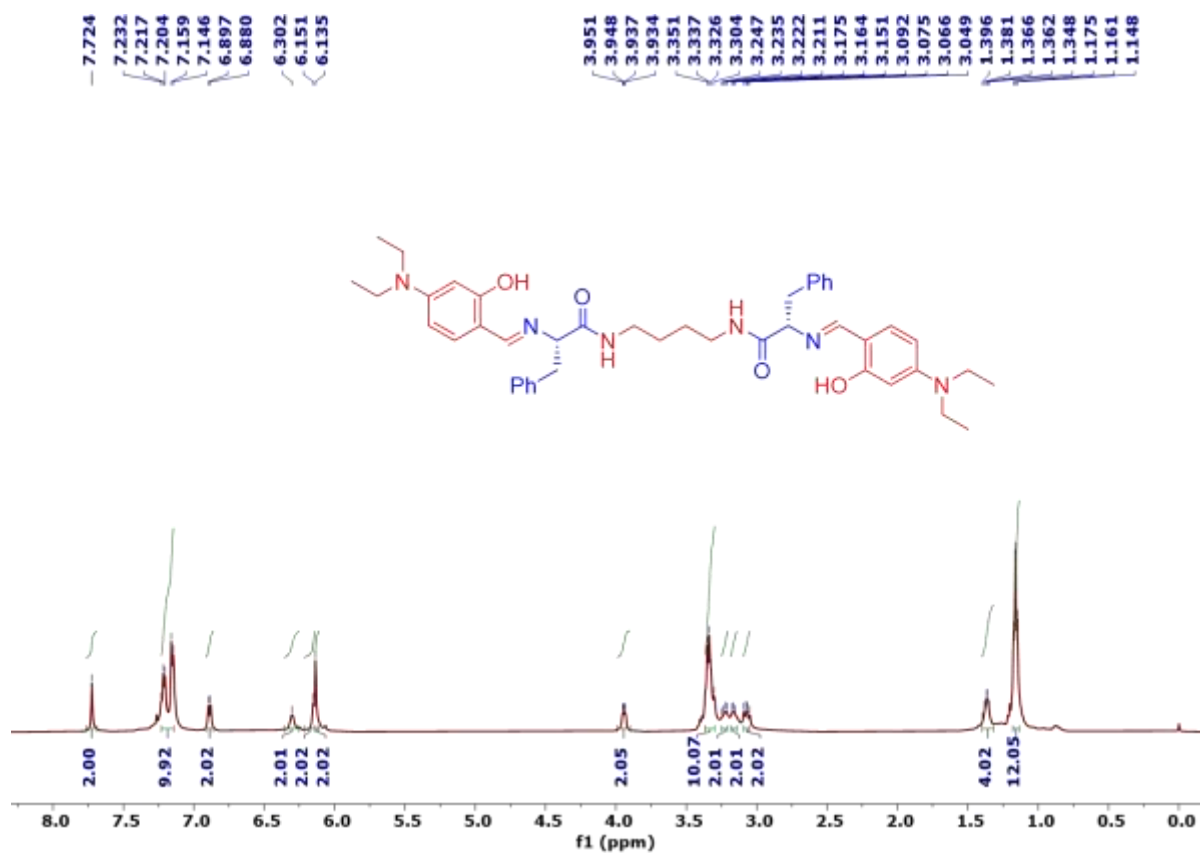

Fig. S4  $^1\text{H}$  NMR (500 MHz,  $\text{CDCl}_3$ ) of **2**

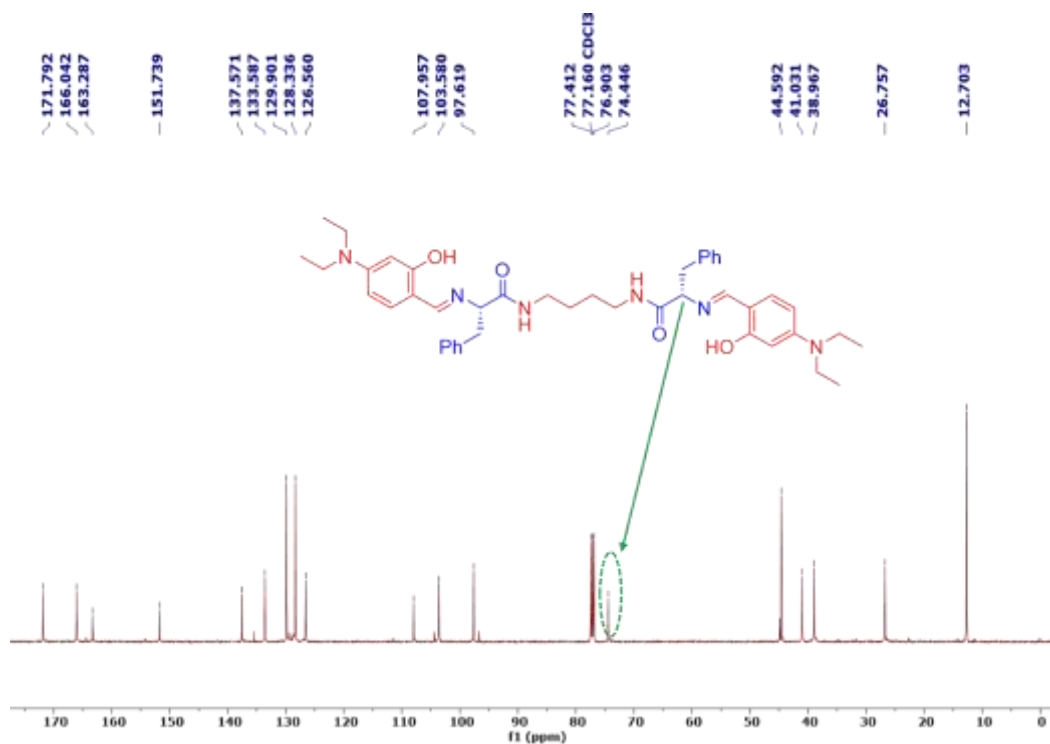

Fig. S5  $^{13}\text{C}\{^1\text{H}\}$  NMR (126 MHz,  $\text{CDCl}_3$ ) of 2

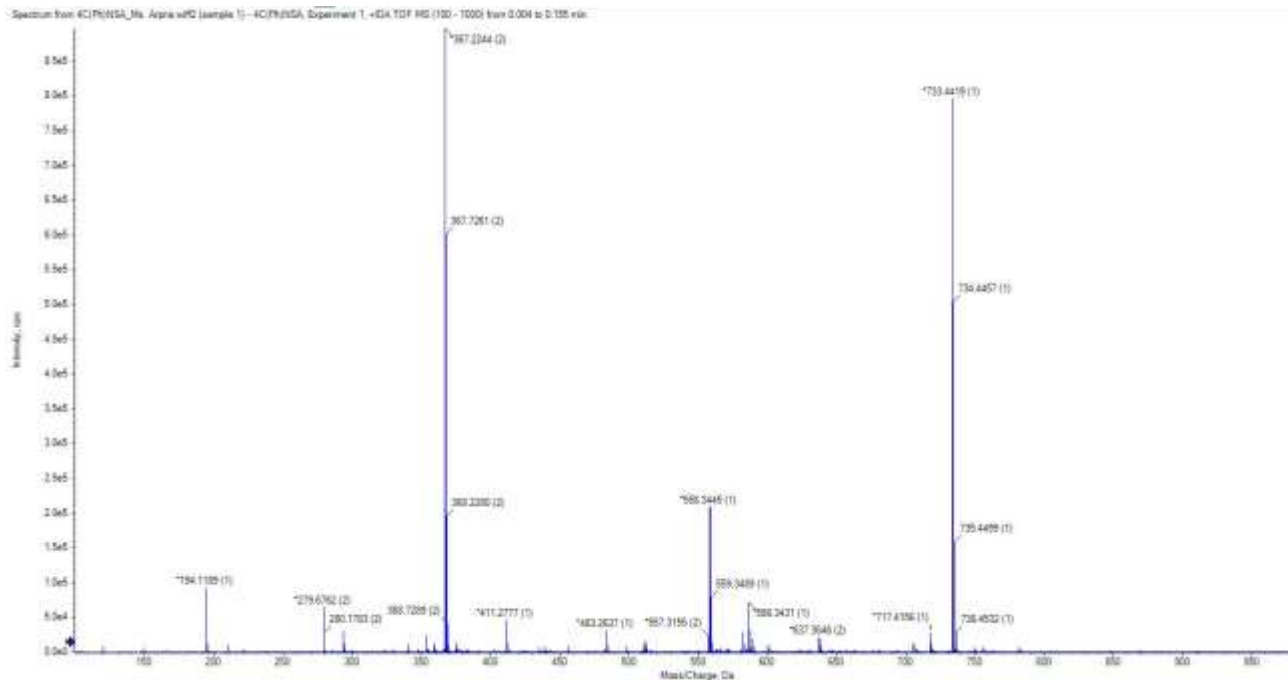

Fig. S6. HRMS data of 2

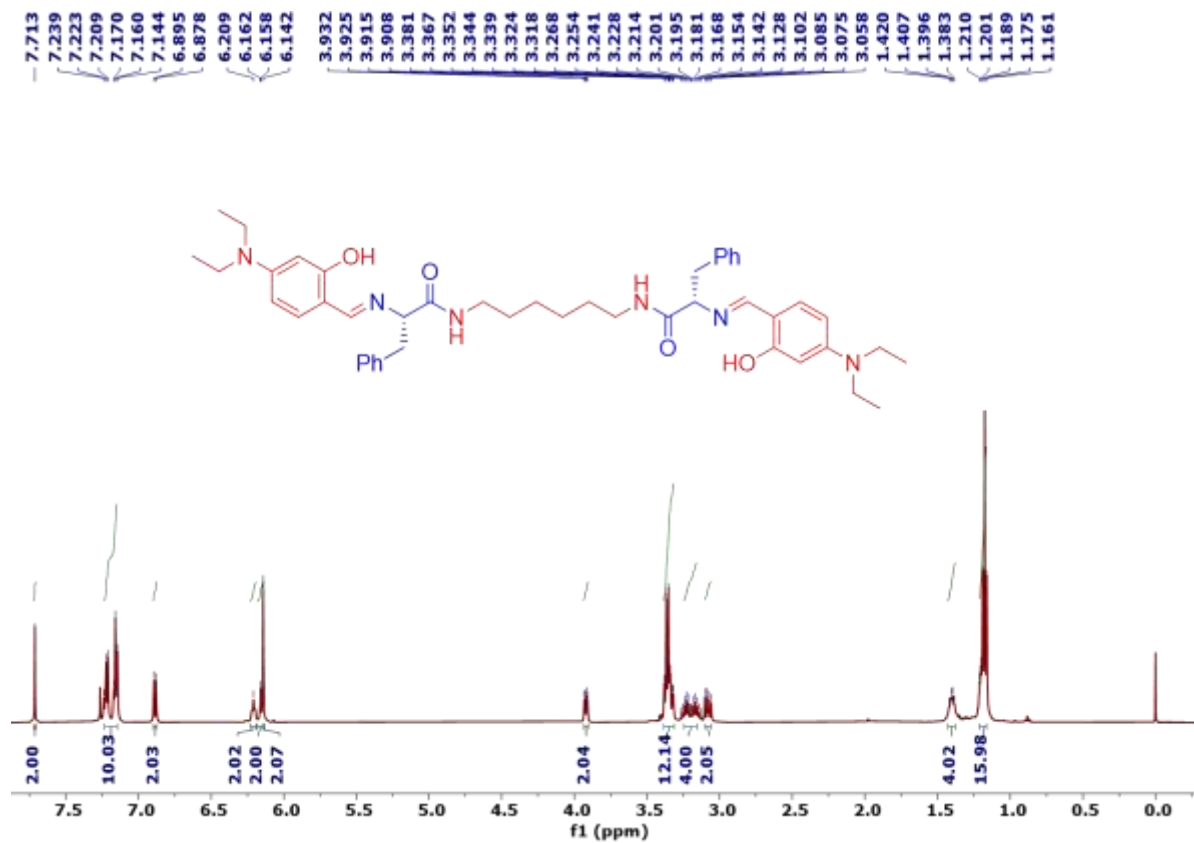

Fig. S7  $^1\text{H}$  NMR (500 MHz,  $\text{CDCl}_3$ ) of 3

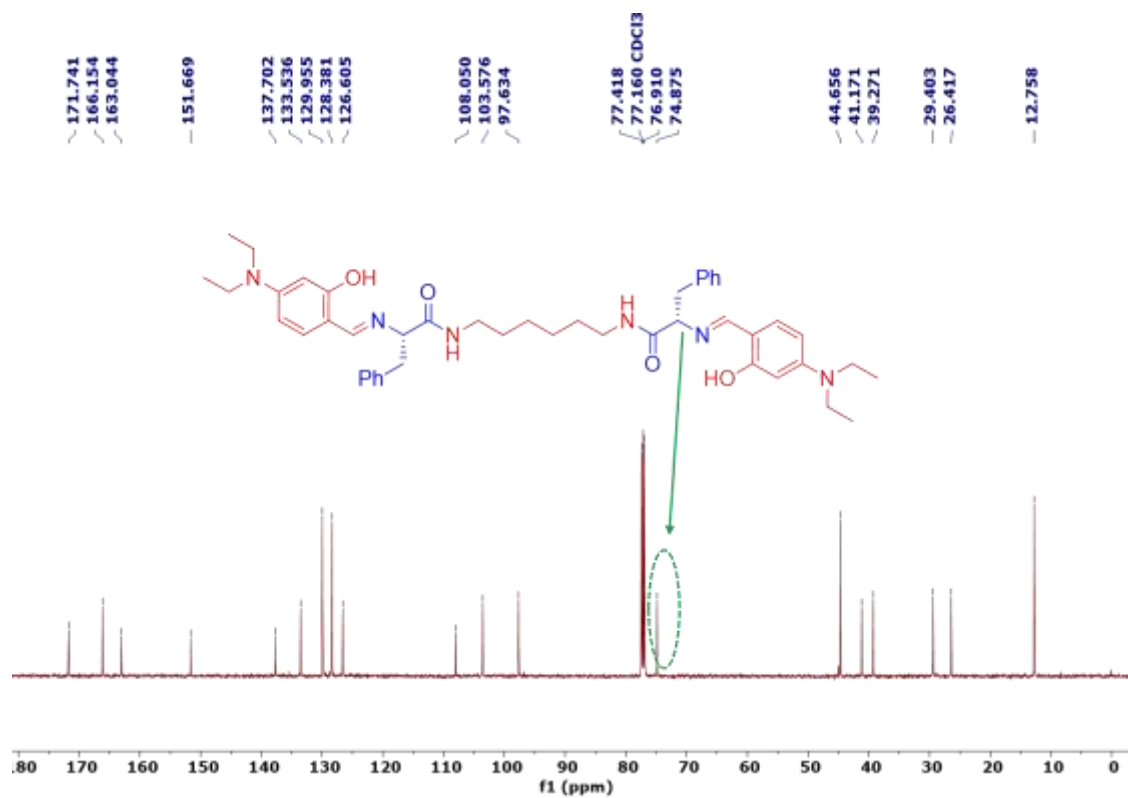

Fig. S8  $^{13}\text{C}\{^1\text{H}\}$  NMR (126 MHz,  $\text{CDCl}_3$ ) of 3

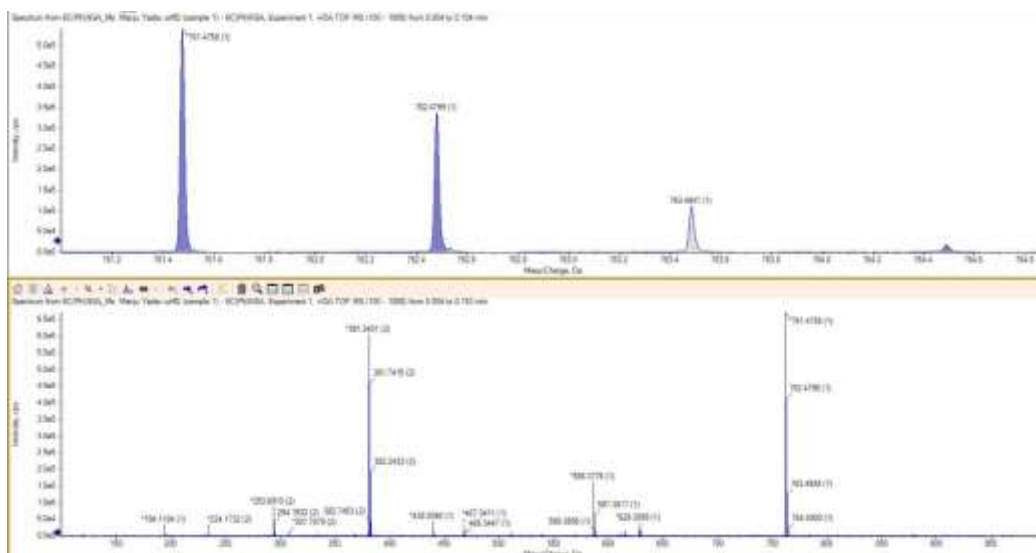

**Fig. S9.** HRMS data of **3**.

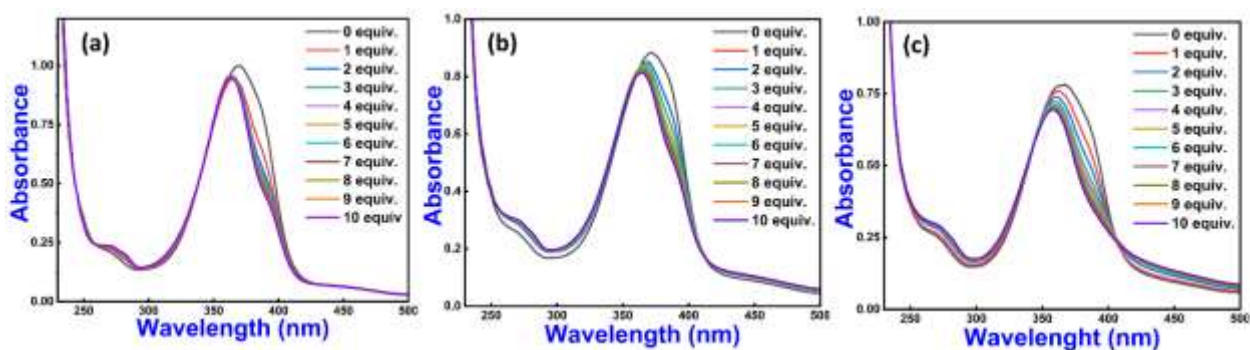

**Fig. S10.** UV-vis spectrum of **1** (a), **2** (b), and **3** (c) with increasing concentration of Zn(II) in HEPES buffer (Water: ethanol = 3:7 v/v, 10 $\mu$ M; pH  $\sim$  7.4).

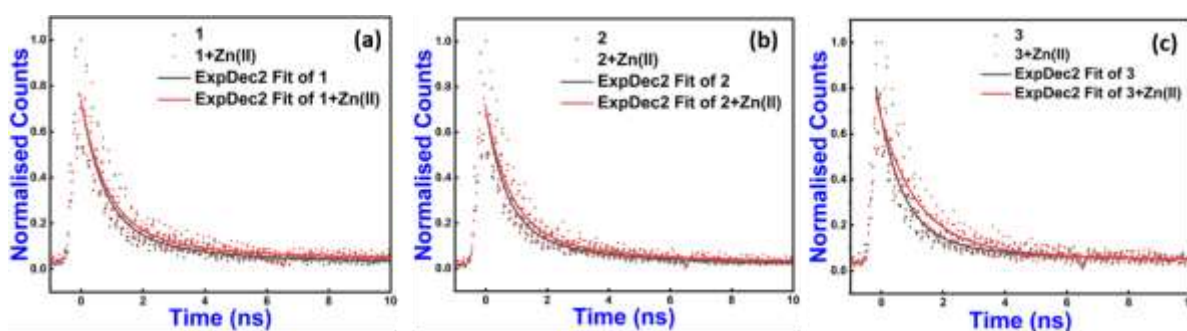

**Fig. S11.** Fluorescence average lifetime decay curve of **1** (10 $\mu$ M) and **1**-Zn(II) (10 equiv. of Zn(II)) (a), **2** (10 $\mu$ M) and **2**-Zn(II) (10 equiv. of Zn(II)) (b), and **3** (10 $\mu$ M) and **3**-Zn(II) (10 equiv. of Zn(II)) (c) in HEPES buffer (Water: ethanol = 3:7 v/v, 10 $\mu$ M; pH  $\sim$  7.4).

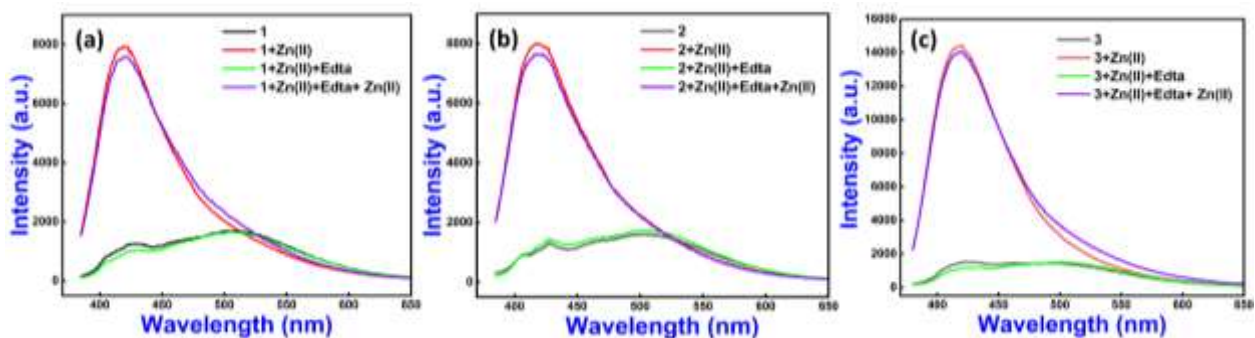

Fig. S12 Reversibility study of 1-Zn(II) (a), 2-Zn(II) (b) and 3-Zn(II) (c) with EDTA.

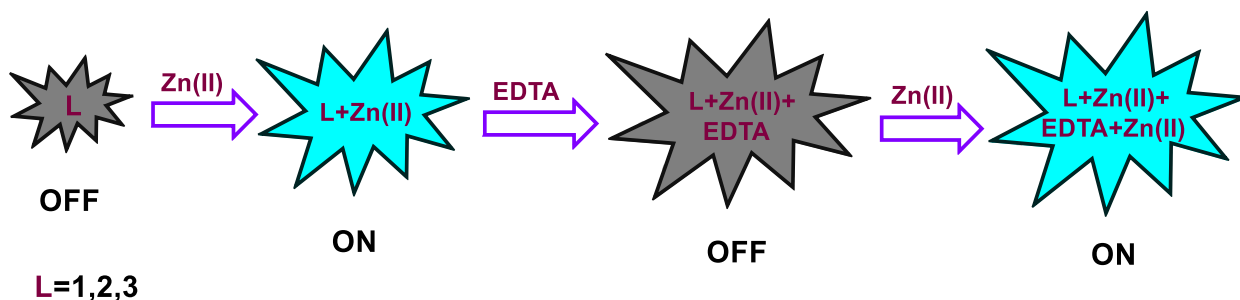

Fig. S13 Proposed model of reversibility for 1-Zn(II), 2-Zn(II) and 3-Zn(II) with EDTA

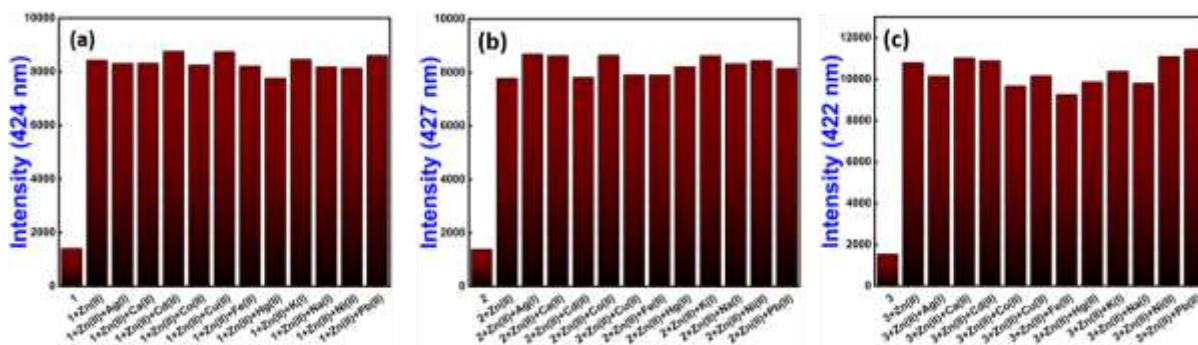

Fig. S14 Interference experiments of 1 (a), 2 (b), and 3 (c) with Zn(II) in presence of other competitive metal ions (at 424 nm, 427 nm, and 422 nm).

### Binding stoichiometry and association constant

We conducted a jobs plot experiment to understand the binding stoichiometry of 1-Zn(II), 2-Zn(II), and 3-Zn(II) systems. The jobs plot experiment from emission data displays

1:1 binding stoichiometry between **1-3** and Zn(II) ion (Figure S15). The association constant was calculated by using the Benesi-Hildebrand equation, i.e.

$$1/I - I_0 = 1/ K_a [Zn(II)] [I_{max} - I_0] + 1/ I_{max} - I_0,$$

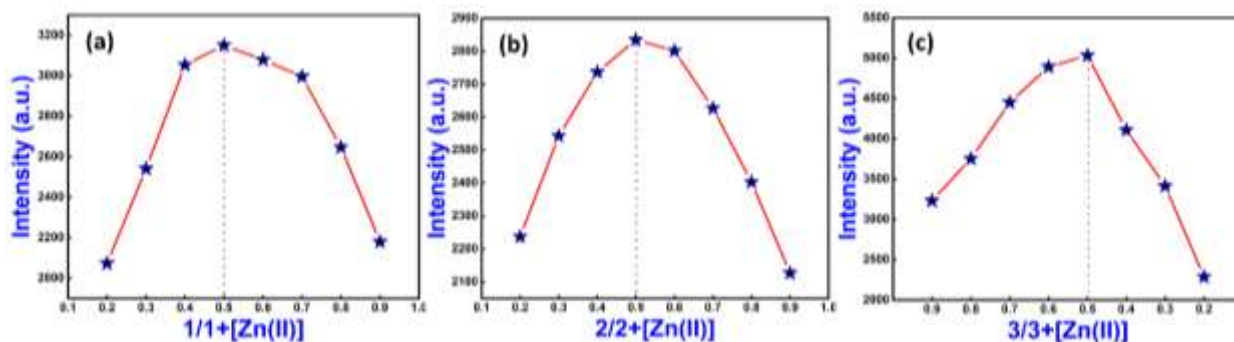

**Fig. S15.** Jobs plot study of **1-Zn(II)** (a), **2-Zn(II)** (b) and **3-Zn(II)** (c) (at 424 nm, 427 nm, and 422 nm) from emission spectra.

where  $I_0$  indicates the emission intensity of neat **1-3** and  $I$  indicate the emission intensity of **1-Zn(II)**, **2-Zn(II)** and **3-Zn(II)** system (variable with Zn(II) ion concentration), whereas,  $I_{max}$  indicates the emission intensity of **1-Zn(II)**, **2-Zn(II)** and **3-Zn(II)** system at the maximum concentration of Zn(II) ion. The association constant ( $K_a$ ) was obtained by plot between  $1/(I - I_0)$  vs.  $1/[Zn(II)]$  and found the value of  $K_a$ ;  $2.0 \times 10^3 \text{ M}^{-1}$  for **1-Zn(II)**,  $3.0 \times 10^3 \text{ M}^{-1}$  for **2-Zn(II)** and  $1.1 \times 10^3 \text{ M}^{-1}$  for **3-Zn(II)** system. (Figure S16).

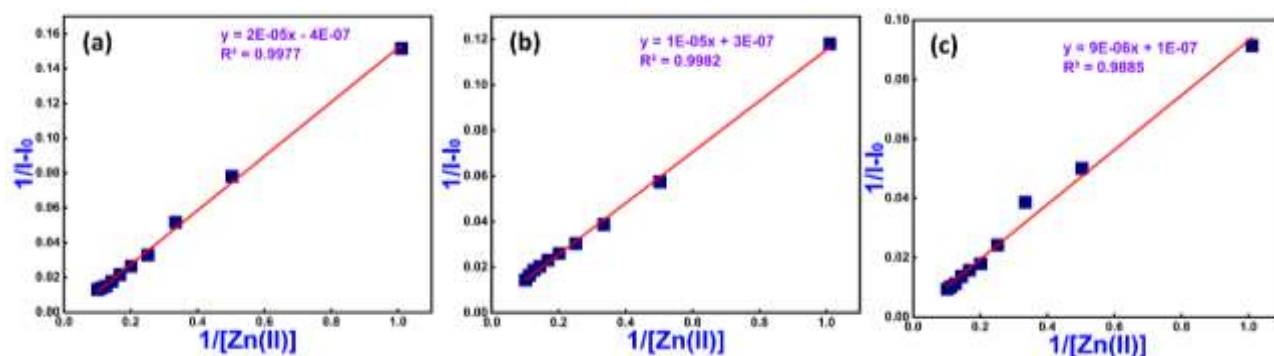

**Fig. S16** Benesi-Hildebrand plot of **1(a)**, **2(b)**, and **3(c)** emission spectra.

To measure the sensitivity of **1-3** toward Zn(II) ion, the varying concentration of Zn(II) ( $10^{-2} \text{ M} - 10^{-12} \text{ M}$ ) were added to the solution of **1-3** ( $10 \mu\text{M}$ ). A graph between fluorescence



intensity and concentration exhibits significant change at  $10^{-6}$  M,  $10^{-7}$  M, and  $10^{-8}$  M concentrations of Zn(II) for **1**-Zn(II), **2**-Zn(II), and **3**-Zn(II) systems, respectively (Figure S17). For better accuracy,  $10^{-6}$  M ( $1 \times 10^{-6}$  M -  $9 \times 10^{-6}$  M),  $10^{-7}$  M ( $1 \times 10^{-7}$  M -  $9 \times 10^{-7}$  M), and  $10^{-8}$  M ( $1 \times 10^{-8}$  M -  $9 \times 10^{-8}$  M) of Zn(II) ion were added to the solution of **1-3** ( $10 \mu\text{M}$ ), respectively and established the accurate limit of detection (LOD) values at  $8.17 \times 10^{-6}$  M or (0.534 ppm) for **1**-Zn(II),  $8.28 \times 10^{-7}$  M or (0.054 ppm) for **2**-Zn(II) and  $8.31 \times 10^{-8}$  M or (0.005 ppm) for **3**-Zn(II) system (Figure S18) by applying the formula  $3\sigma/S$  where  $\sigma$  indicate the standard deviation of neat **1-3** and S indicate the slope from the plot between the concentration of sample and emission intensity.

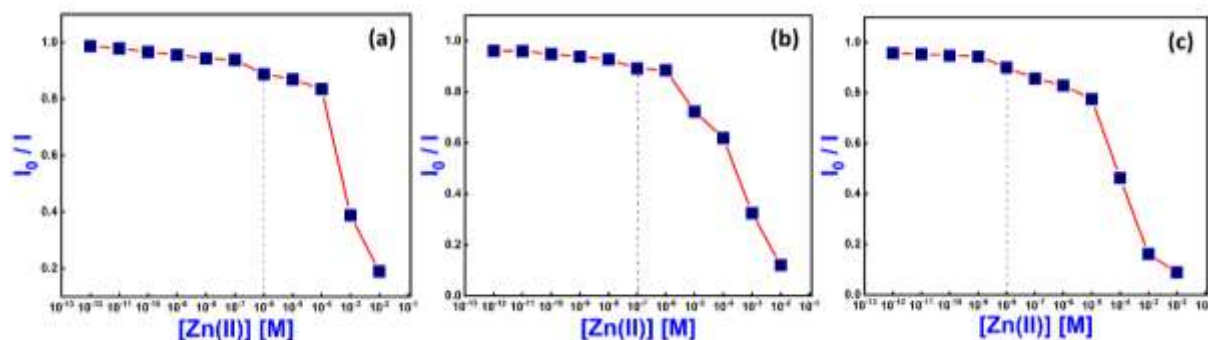

**Fig. S17** Sensitivity plots of **1**(a), **2**(b), and **3**(c) with different concentration of Zn(II) ion ( $10^{-2}$  –  $10^{-12}$  M) from emission spectra.

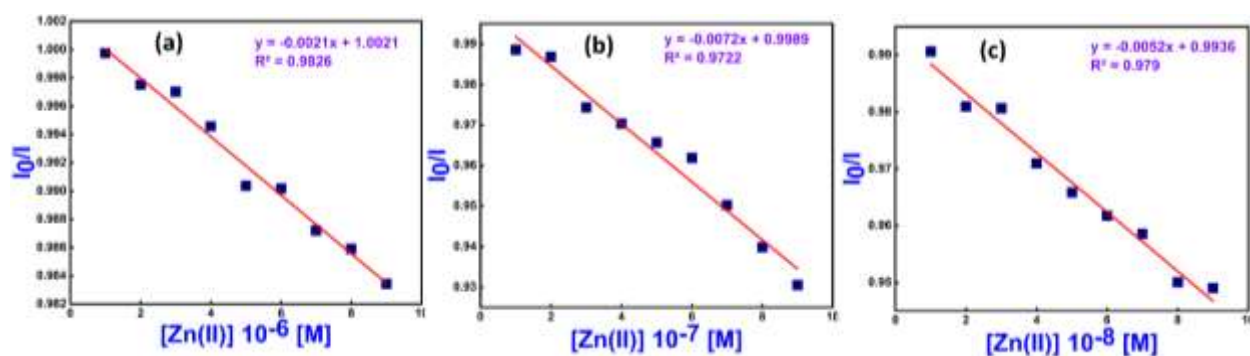

**Fig. S18** LOD plots of **1** (a), **2** (b), and **3** (c) with different concentration of Zn(II) ion ( $1 \times 10^{-6}$  M to  $9 \times 10^{-6}$  M for **1**,  $1 \times 10^{-7}$  M to  $9 \times 10^{-7}$  M for **2** and  $1 \times 10^{-8}$  M to  $9 \times 10^{-8}$  M for **3**) via; emission spectra.

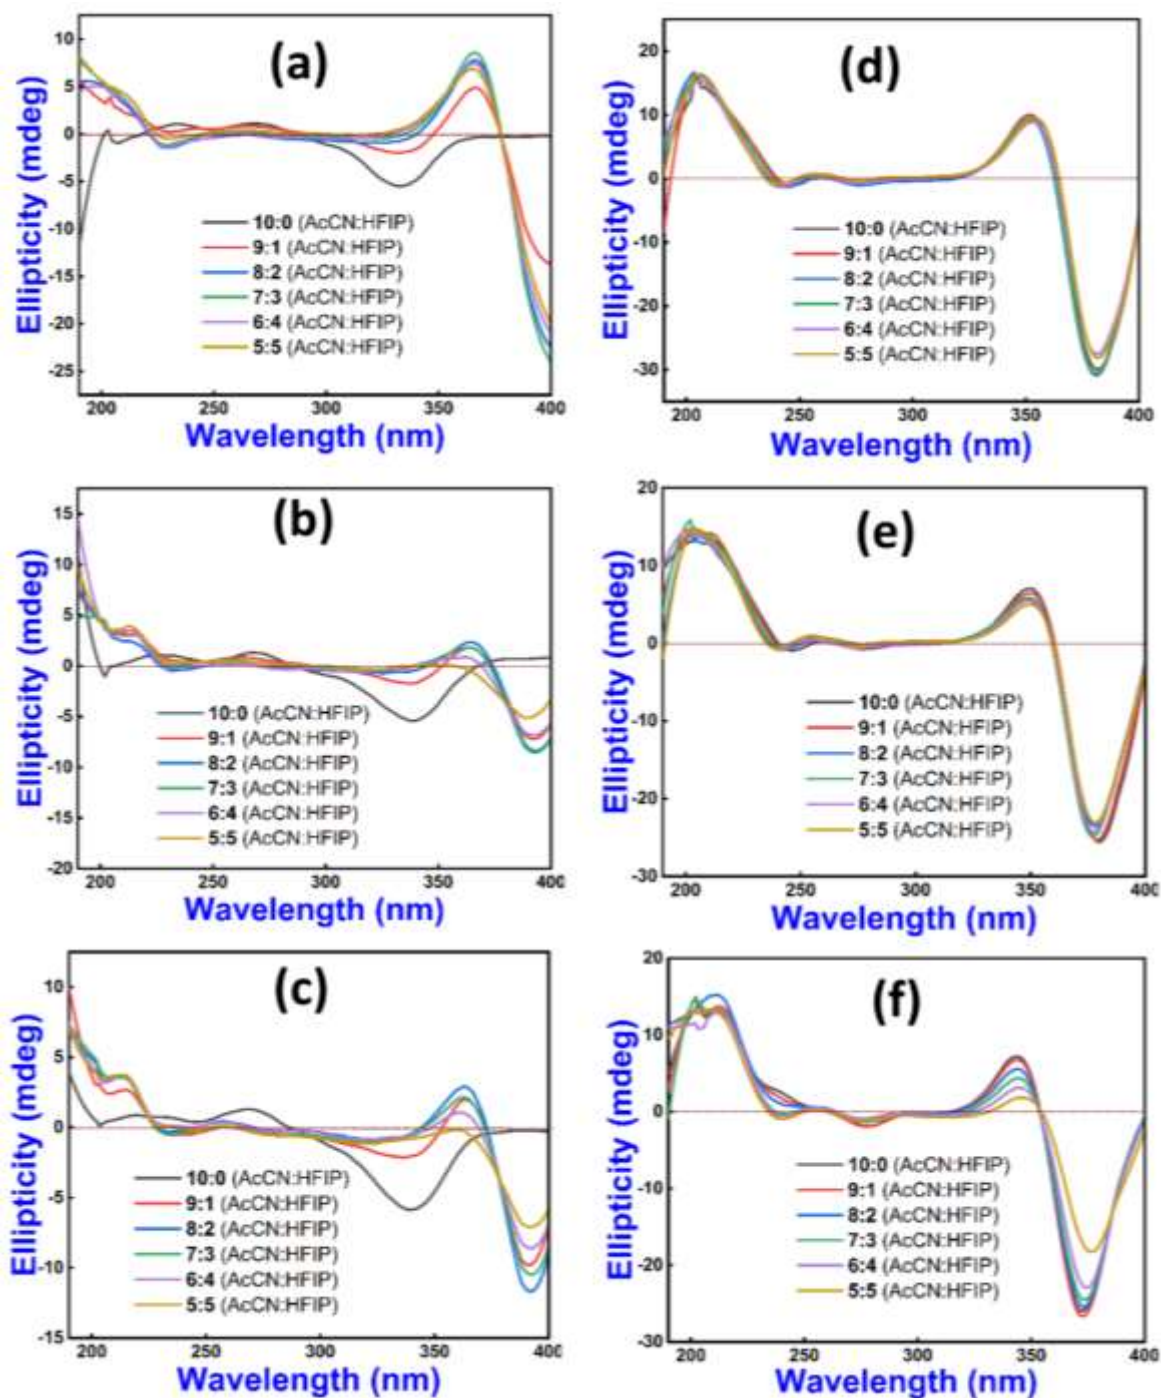

**Fig. S19A.** Circular Dichroism (CD) spectra of **1** (a), **2** (b), **3** (c) and **1-Zn(II)** (d), **2-Zn(II)** (e), **3-Zn(II)** (f), in different solvent combination of Acetonitrile and Hexafluoro isopropanol (HFIP) (AcCN:HFIP; v/v, 10:0 (Black line), 9:1 (Red line), 8:2 (Blue line), 7:3 (Green line), 6:4 (Voilet line), 5:5 (Yellow line))

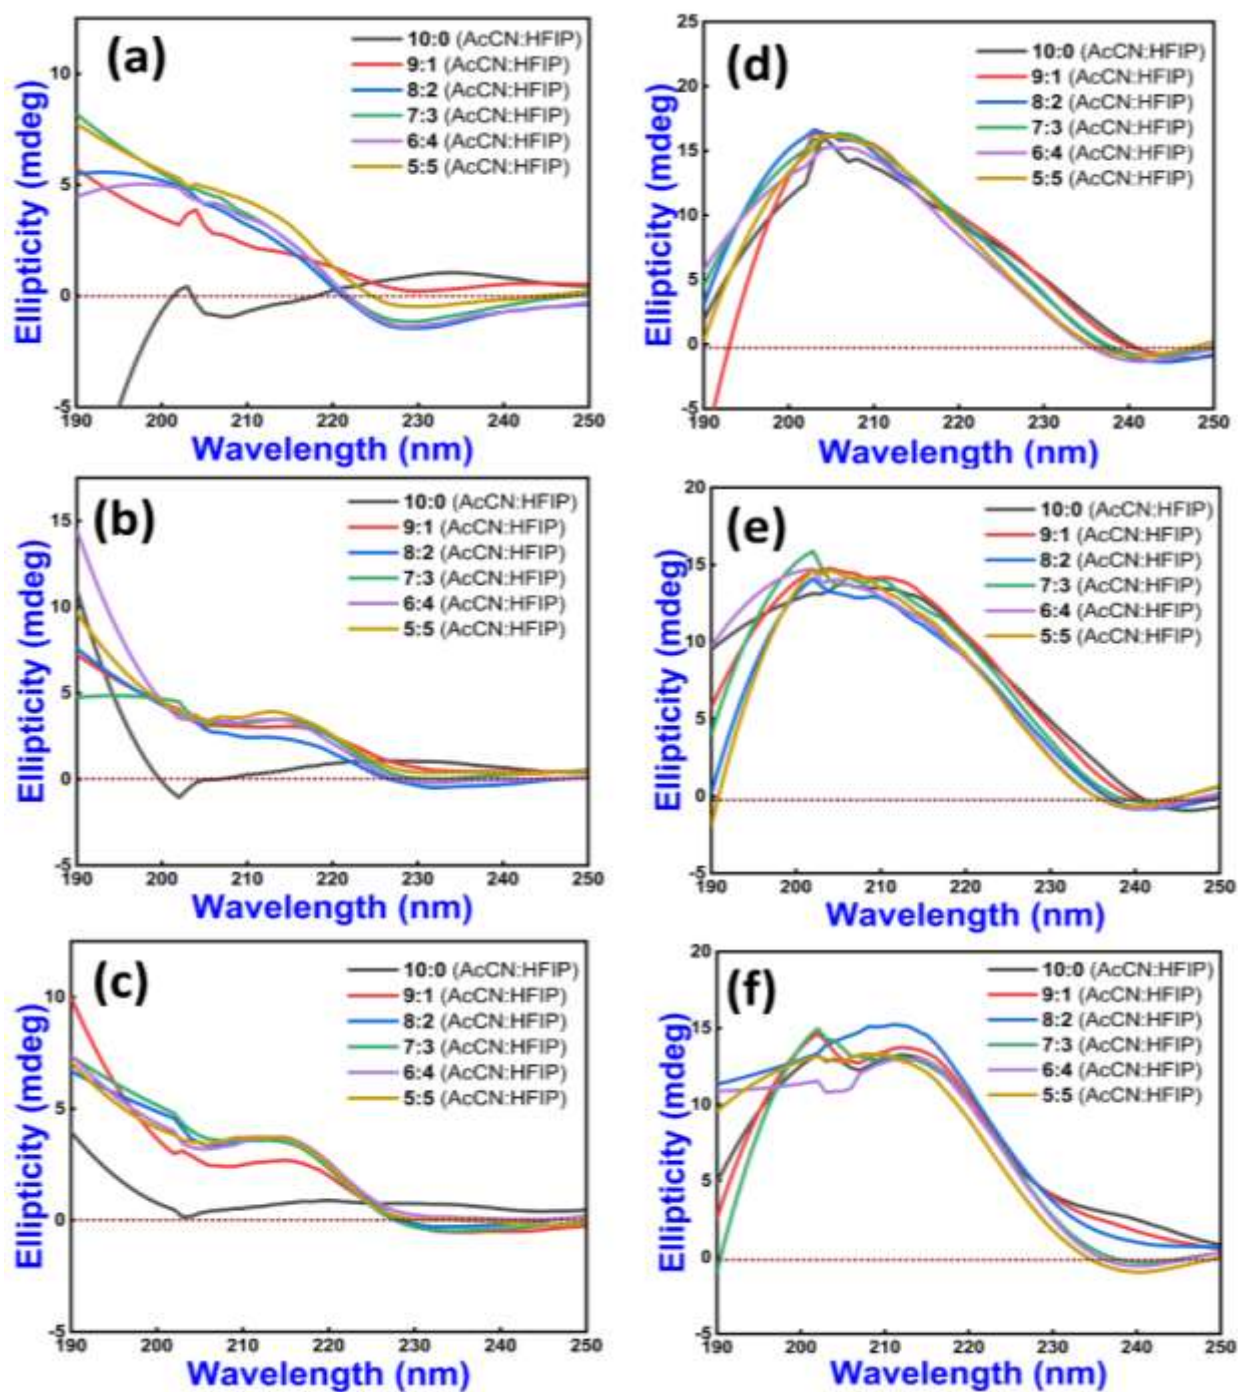

**Fig. S19B.** Circular Dichroism (CD) spectra of **1** (a), **2** (b), **3** (c) and **1-Zn(II)** (d), **2-Zn(II)** (e), **3-Zn(II)** (f), in different solvent combination of Acetonitrile and Hexafluoro isopropanol (HFIP) (AcCN:HFIP; v/v, 10:0 (Black line), 9:1 (Red line), 8:2 (Blue line), 7:3 (Green line), 6:4 (Voilet line), 5:5 (Yellow line)). Figure shown CD spectra between 190 nm to 250nm.

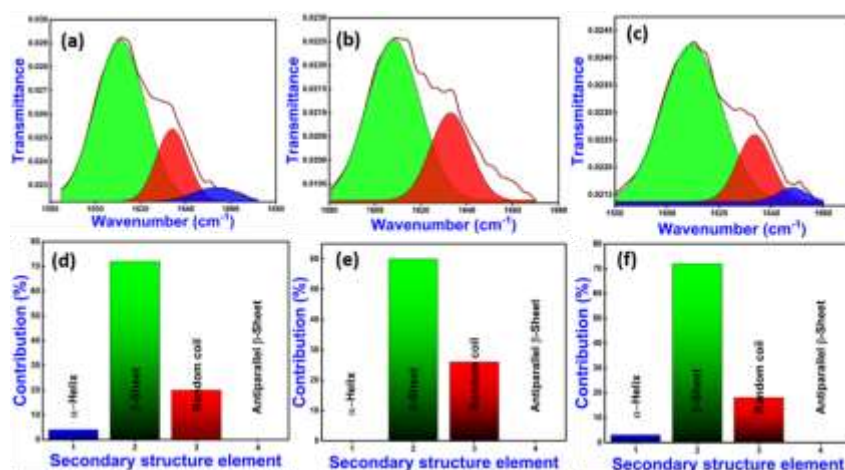

**Fig. S20 A.** (a) IR spectra of **1** (brown line) and deconvoluted plot (colour fill area), (d) Contributions of Secondary structure in self-assembly of **1**. (b) IR spectra of **2** (brown line) and deconvoluted plot (colour fill area), (e) Contributions of Secondary structure in self-assembly of **2**, (c) IR spectra of **3** (brown line) and deconvoluted plot (colour fill area), (f) Contributions of Secondary structure in self-assembly of **3**, IR Deconvolution plot in amide region 1580 to 1680  $\text{cm}^{-1}$  by fitting multiple Gaussian peaks.

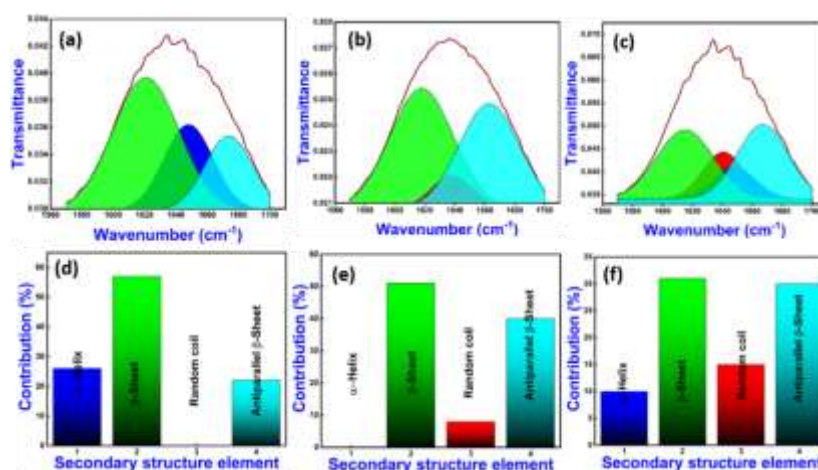

**Fig. S20 B.** (a) IR spectra of **1-Zn(II)** (brown line) and deconvoluted plot (colour fill area), (d) Contributions of Secondary structure in self-assembly of **1-Zn(II)**. (b) IR spectra of **2-Zn(II)** (brown line) and deconvoluted plot (colour fill area), (e) Contributions of Secondary structure in self-assembly of **2-Zn(II)**, (c) IR spectra of **3-Zn(II)** (brown line) and deconvoluted plot (colour fill area), (f) Contributions of Secondary structure in self-assembly

of **3**-Zn(II), IR Deconvolution plot in amide region 1570 to 1700  $\text{cm}^{-1}$  by fitting multiple Gaussian peaks.

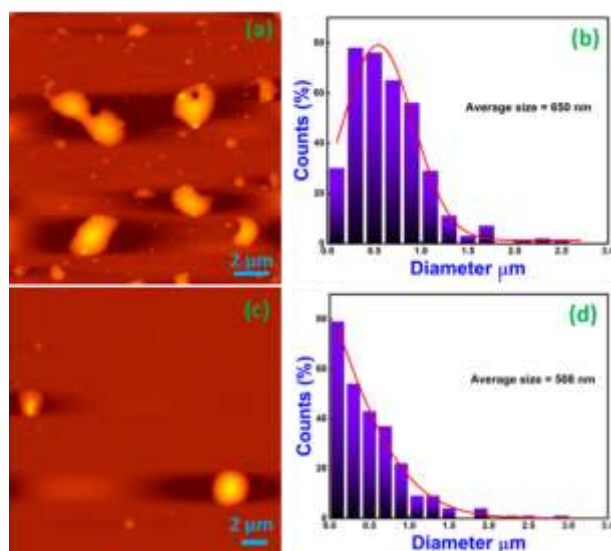

**Fig. S21** AFM images (a) 2D self-assembly representation of **1**, (b) its corresponding particle size distribution histogram plot, (c) 2D self-assembly representation of **1**-Zn(II) complex, (d) its corresponding particle size distribution histogram plot.

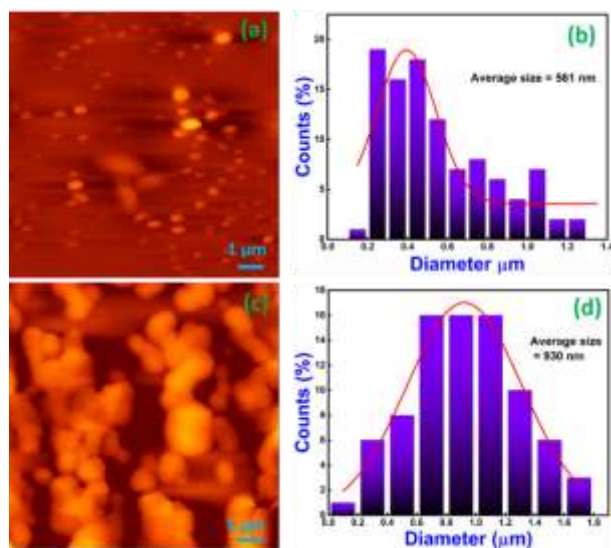

**Fig. S22** AFM images (a) 2D self-assembly representation of **2**, (b) its corresponding particle size distribution histogram plot, (c) 2D self-assembly representation of **2**-Zn(II) complex, (d) its corresponding particle size distribution histogram plot.

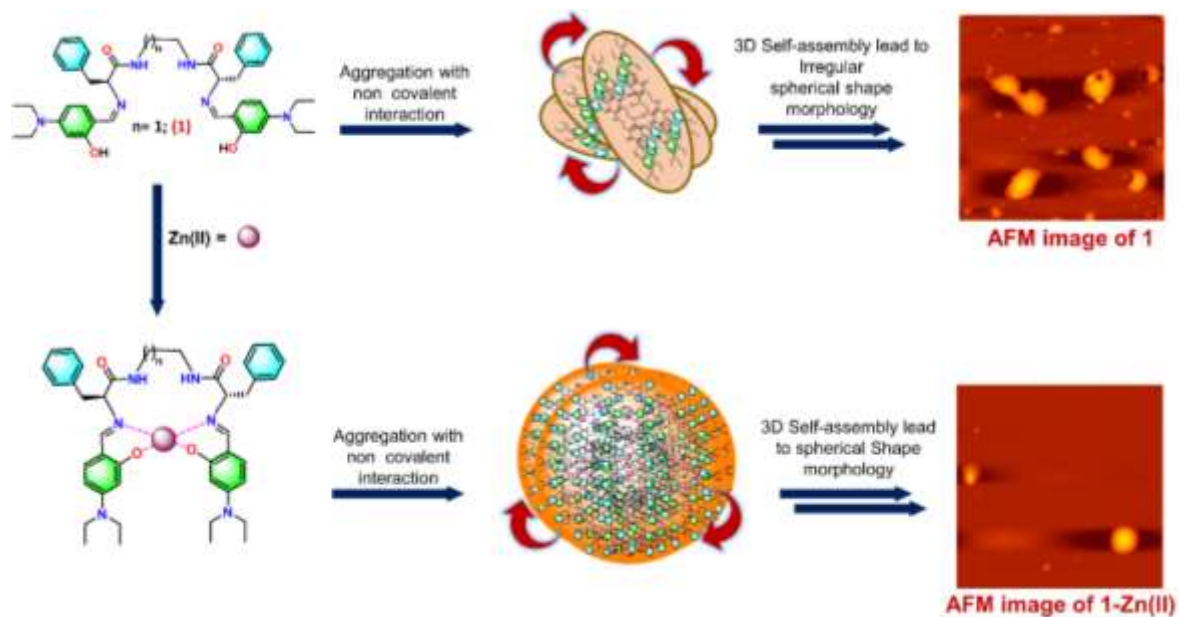

**Scheme. S1.** A Proposed model of change in self-assembly of **1** by addition of Zn(II) ions through 2D AFM image.

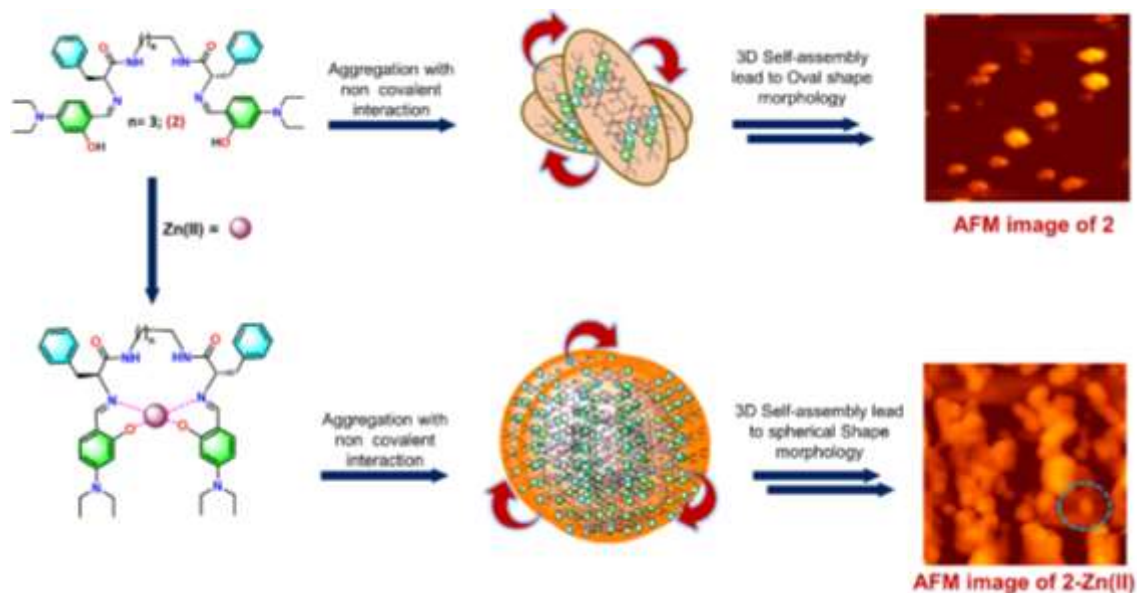

**Scheme. S2.** A Proposed model of change in self-assembly of **2** by addition of Zn(II) ions through 2D AFM image.

**Table S1** Quantum yield of neat pseudopeptide **1-3** with and without Zn(II) ions.

| S.No | Entry    | Quantum yield |
|------|----------|---------------|
| 1    | 1        | 0.03          |
| 2    | 1+Zn(II) | 0.08          |
| 3    | 2        | 0.02          |
| 4    | 2+Zn(II) | 0.08          |
| 5    | 3        | 0.03          |
| 6    | 3+Zn(II) | 0.13          |

**Table S2** Fluorescence decay parameters of **1-3** in ethanol-water with and without Zn(II).

| S.No. | Entry    | (A)                       | $\tau$ (ns)          | $\langle\tau\rangle$ (ns) |
|-------|----------|---------------------------|----------------------|---------------------------|
| 1     | 1        | 0.54371 (A <sub>1</sub> ) | 0.72118 ( $\tau_1$ ) |                           |
| 2     |          | 0.16398 (A <sub>2</sub> ) | 3.02126 ( $\tau_2$ ) | 1.2540                    |
| 3     | 1+Zn(II) | 0.54469 (A <sub>1</sub> ) | 0.80282 ( $\tau_1$ ) |                           |
| 4     |          | 0.14668 (A <sub>2</sub> ) | 3.3778 ( $\tau_2$ )  | 1.3490                    |
| 5     | 2        | 0.52808 (A <sub>1</sub> ) | 0.64934 ( $\tau_1$ ) |                           |
| 6     |          | 0.16273 (A <sub>2</sub> ) | 3.06204 ( $\tau_2$ ) | 1.2175                    |
| 7     | 2+Zn(II) | 0.53946 (A <sub>1</sub> ) | 0.79712 ( $\tau_1$ ) |                           |
| 8     |          | 0.14086 (A <sub>2</sub> ) | 3.55353 ( $\tau_2$ ) | 1.3677                    |
| 9     | 3        | 0.52793 (A <sub>1</sub> ) | 0.79482 ( $\tau_1$ ) |                           |
| 10    |          | 0.09562 (A <sub>2</sub> ) | 3.70187 ( $\tau_2$ ) | 1.2404                    |

|           |                 |                           |                           |        |
|-----------|-----------------|---------------------------|---------------------------|--------|
| <b>11</b> | <b>3+Zn(II)</b> | 0.56368 (A <sub>1</sub> ) | 1.18114 (τ <sub>1</sub> ) |        |
| <b>12</b> |                 | 0.06995 (A <sub>2</sub> ) | 6.61995 (τ <sub>2</sub> ) | 1.7814 |

Dynamic parameters determined from  $A_1 \exp(-x/\tau_1) + A_2 \exp(-x/\tau_2) + y_0$

The weighted mean lifetime  $\langle \tau \rangle$  was calculated by using following equation:

$$\langle \tau \rangle = (A_1 \tau_1 + A_2 \tau_2) / (A_1 + A_2)$$

where,  $A_1/A_2$  and  $\tau_1/\tau_2$  are the fractions (A) and lifetimes (τ) respectively.

Solution concentration = 10 μM.

## Apparatus and Materials

NMR (<sup>1</sup>H and <sup>13</sup>C) spectra were performed in solvent CDCl<sub>3</sub> on a JEOL 500 FT-NMR at 500 MHz and 126 MHz respectively. HRMS experiments were studied on SCIEX X500R (QTOF-MS) mass spectrometer whereas, UV-Visible and fluorescence spectroscopy were recorded on Agilent Cary 60 UV-Visible with serial no.-MY19329220 single beam UV-Visible spectrometer and Fluoromax 4CP plus spectrofluorometer respectively by using a 10 mm quartz cuvette at room temperature. Time-resolved Photoluminescence (TRPL) spectroscopy were performed on laser-pulse diode laser with model number WITEC alpha 300 focus innovation (power = 0.250 mW). Circular Dichroism (CD) spectra of all compounds were performed on JASCO J-1500-450 at room temperature with serial no. D062161638 and Power A C 220V 50/60HZ 770VA with quartz cuvette (4ml, path length 1cm) and all CD spectrum were recorded in the 190 nm to 400 nm range.



### **Sample preparation of CD Experiment**

Sample **1-3** were dissolved in acetonitrile ( $10^{-3}$  M) and zinc nitrate salt in distilled water ( $10^{-2}$  M) respectively. The experiment was performed in solvent mixture of Acetonitrile (AcCN) and Hexafluoro isopropanol (HFIP) in different ratio (AcCN:HFIP; 10:0, 9:1, 8:2, 7:3, 6:4, and 5:5) with same concentration ( $10^{-5}$  M).

All materials were procured from a commercial supplier and used it as received. *Z-L*-Phenylalanine amino acid was procured from SRL while HBr\ Acetic Acid, 4-(Diethylamino)salicylaldehyde, DCC, N-Hydroxysuccinimide, and all aliphatic diamine were procured from Sigma-Aldrich, India. Several metal salt such as,  $\text{AgNO}_3$ ,  $\text{Cd}(\text{NO}_3)_2 \cdot 4\text{H}_2\text{O}$ ,  $\text{Co}(\text{NO}_3)_2 \cdot 6\text{H}_2\text{O}$ ,  $\text{Cu}(\text{NO}_3)_2 \cdot 3\text{H}_2\text{O}$ ,  $\text{Ni}(\text{NO}_3)_2 \cdot 6\text{H}_2\text{O}$ ,  $\text{Fe}(\text{NO}_3)_3 \cdot 9\text{H}_2\text{O}$ ,  $\text{Pb}(\text{NO}_3)_2$ ,  $\text{Ca}(\text{NO}_3)_2 \cdot 4\text{H}_2\text{O}$ ,  $\text{Zn}(\text{NO}_3)_2$ ,  $\text{KNO}_3$ ,  $\text{Hg}(\text{NO}_3)_2$ , and  $\text{NaNO}_3$  were procured from Himedia.

### **Atomic force microscopy (AFM) analysis**

AFM study was performed to explore the structural morphology of **1-3** using NT-MDT with model no. Solver next. Freshly prepared sample **1-3** (with and without Zn(II)) at  $10^{-5}$  M concentration of pure ethanolic solution and 5-10  $\mu\text{l}$  aliquots of this sample was drop cast as a thin film on cover slip (glass sheet). The sample was dried for 10-12 hr. in dust free environment using vacuum desiccator. The number of partical from AFM image is calculated by using Nova Px\_3.4 software by using the grain analysis tool.

### **FT-IR Spectroscopy**

All FT-IR spectra of compound were performed on JASCO FT/IR-4700 by using KBr pellet, whereas for IR deconvolution study, all IR spectra were taken in liquid state. For sample preparation, neat compound **1-3** were dissolved in Acetonitrile ( $10^{-3}$  M), while **1-3** with

Zn(II) ion were prepared in mixture of Acetonitrile and water ( $10^{-3}$  M). The IR spectra in amide region I were fitted by multiple Gaussian peak and secondary structure contribution calculated through OriginPro 2021 software.

## Experimental details

### General method for optical measurement

For the study of photophysical measurement of **1-3** ( $10\mu\text{M}$ ), the stock solution was prepared in HEPES buffer (Water:Ethanol = 3:7 v/v,  $10\mu\text{M}$ ; pH  $\sim$  7.4) at room temperature and all metal ion solutions (Ag(I), Ca(II), Cd(II), Co(II), Cu(II), Fe(III), Hg(II), K(I), Na(I), Ni(II), Pb(II), and Zn(II)) were prepared by dissolving their nitrate salts in distilled water ( $10\text{ mM}$ ). In the titration study, metal ions solution was added portion-wise in a  $3.0\text{ ml}$  solution of **1-3** ( $10\mu\text{M}$ ) in quartz cuvette ( $4\text{ml}$ , path length  $1\text{cm}$ ).

### Synthesis and characterization

**Synthesis of 1: (2S,2'S)-N,N'-(ethane-1,2-diyl)bis(2-(((E)-4-(diethylamino)-2-hydroxybenzylidene)amino)-3-phenylpropanamide)** Compound **A-C** were synthesised by following literature procedures.<sup>1</sup> The synthetic route of pseudopeptides **1-3** is illustrated in Scheme 1. Firstly, Compound **A** ( $708\text{ mg}$ ,  $2\text{ mmol}$ ) was dissolved in  $10\text{ ml}$  of dry ethanol; after a clear transparent solution was formed, it was added to  $10\text{ ml}$  of dry Ethanolic solution of 4-(Diethylamino)salicylaldehyde ( $772\text{ mg}$ ,  $4\text{ mmol}$ ) drop wise at  $90^\circ\text{C}$ . The resulting solution mixture was refluxed for  $4\text{-}5\text{ hr.}$ , and after completing the reaction, evaporate the solvent through rotavapor. The final product was washed through n-hexane multiple times, and we obtained desired product. Yield ( $1.155\text{ g}$ ,  $1.63\text{ mmol}$ ,  $82\%$ ); M.P.  $77^\circ\text{C}$ ; IR (KBr pellet):  $3411, 3296, 3062, 3026, 2971, 2927, 2871, 1659, 1633\text{ cm}^{-1}$ ;  $^1\text{H NMR}$  ( $500\text{ MHz}$ ,  $\text{CDCl}_3$ ,  $23^\circ\text{C}$ , TMS)  $\delta$   $7.65\text{ (s, 2H)}$ ,  $7.23 - 7.13\text{ (m, 10H)}$ ,  $6.83\text{ (d, } J = 8.5\text{ Hz, 2H)}$ ,  $6.56\text{ (s,$

2H), 6.13 (s, 2H), 6.11 (s, 2H), 3.90 – 3.88 (m, 2H), 3.35 – 3.30 (m, 14H), 3.01 (dd,  $J = 13.5$ , 9.5 Hz, 2H), 1.15 (t,  $J = 7.0$  Hz, 12H);  $^{13}\text{C}$  NMR (126 MHz,  $\text{CDCl}_3$ , 23°C, TMS)  $\delta$  172.82, 166.44, 163.05, 151.68, 137.91, 133.58, 129.95, 128.39, 126.58, 108.13, 103.50, 97.75, 75.02, 44.64, 41.03, 39.61, 12.78. HRMS (ESI-TOF)  $m/z$ :  $[\text{M} + \text{H}]^+$  calcd for  $\text{C}_{42}\text{H}_{53}\text{N}_6\text{O}_4$ , 705.4123; found, 705.4124.

**Synthesis of 2: (2S,2'S)-N,N'-(butane-1,4-diyl)bis(2-(((E)-4-(diethylamino)-2-hydroxybenzylidene)amino)-3-phenylpropanamide)** This compound was obtained as described above and starting from **B** (765 mg, 2 mmol) and 4-(Diethylamino)salicylaldehyde (772 mg, 4 mmol); Yield (1.230g, 1.67 mmol, 84%); M.P. 70°C; IR (KBr pellet): 3402, 3297, 3061, 3028, 2970, 2930, 2872, 1651, 1622  $\text{cm}^{-1}$ ;  $^1\text{H}$  NMR (500 MHz,  $\text{CDCl}_3$ , 23°C, TMS)  $\delta$  7.72 (s, 2H), 7.23 – 7.14 (m, 10H), 6.88 (d,  $J = 8.5$  Hz, 2H), 6.30 (s, 2H), 6.15 (s, 2H), 6.13 (s, 2H), 3.94 (dd,  $J = 7.0$ , 1.5 Hz, 2H), 3.35 – 3.30 (m, 10H), 3.24 – 3.21 (m, 2H), 3.17 – 3.15 (m, 2H), 3.07 (dd,  $J = 13.0$ , 8.5 Hz, 2H), 1.40 – 1.34 (m, 4H), 1.17 – 1.14 (m, 12H);  $^{13}\text{C}$  NMR (126 MHz,  $\text{CDCl}_3$ , 23°C, TMS)  $\delta$  171.79, 166.04, 163.29, 151.74, 137.57, 133.59, 129.90, 128.34, 126.56, 107.96, 103.58, 97.62, 74.45, 44.59, 41.03, 38.97, 26.76, 12.70. HRMS (ESI-TOF)  $m/z$ :  $[\text{M} + \text{H}]^+$  calcd for  $\text{C}_{44}\text{H}_{57}\text{N}_6\text{O}_4$ , 733.4436; found, 733.4419.

**Synthesis of 3: (2S,2'S)-N,N'-(hexane-1,6-diyl)bis(2-(((E)-4-(diethylamino)-2-hydroxybenzylidene)amino)-3-phenylpropanamide).** This compound was obtained as described above and starting from **C** from (850 mg, 2 mmol) and 4-(Diethylamino) Salicylaldehyde (772 mg, 4 mmol);. Yield (1.262g, 1.65 mmol, 83%); M.P. 96°C; IR (KBr pellet): 3418, 3208, 3060, 3027, 2972, 2931, 2867, 1659, 1634  $\text{cm}^{-1}$ ;  $^1\text{H}$  NMR (500 MHz,  $\text{CDCl}_3$ , 23°C, TMS)  $\delta$  7.71 (s, 2H), 7.23 – 7.14 (m, 10H), 6.88 (d,  $J = 8.5$  Hz, 2H), 6.21 (s, 2H), 6.16 (d,  $J = 2.0$  Hz, 2H), 6.14 (s, 2H), 3.92 (dd,  $J = 8.5$ , 3.5 Hz, 2H), 3.38 – 3.31 (m, 12H), 3.26 – 3.12 (m, 4H), 3.08 (dd,  $J = 13.5$ , 8.5 Hz, 2H), 1.42 – 1.38 (m, 4H), 1.21 – 1.16 (m, 16H);  $^{13}\text{C}$  NMR (126 MHz,  $\text{CDCl}_3$ , 23°C, TMS)  $\delta$  171.74, 166.15, 163.04, 151.67,

137.70, 133.54, 129.96, 128.38, 126.61, 108.05, 103.58, 97.63, 74.87, 44.66, 41.17, 39.27, 29.40, 26.42, 12.76. HRMS (ESI-TOF)  $m/z$ :  $[M + H]^+$  calcd for  $C_{46}H_{61}N_6O_4$ , 761.4749; found, 761.4758.

**References:**

1. J. Becerril, M. Bolte, M. I. Burguete, F. Galindo, E. García-España, S. V. Luis and J. F. Miravet, *J. Am. Chem. Soc.*, 2003, **125**, 6677–6686.
